# Supplementary material for: Human CD4+CD8α+ Tregs induced by Faecalibacterium prausnitzii protect against intestinal inflammation
Source: JCI journal article supplement (doi:10.1172/jci.insight.154722), 2022-05-10
Supplement: sd1 [file 1]

# 1 SUPPLEMENTAL INFORMATION

## 2 Supplemental Methods

3 *Screening for HLA-restriction.* Grown DP8 $\alpha$  Treg clones were screened for their HLA-DR  
4 restriction using the L243 blocking antibody. To this end, autologous monocytes (CD14<sup>+</sup>  
5 magnetically purified, Miltenyi Biotec) were loaded overnight with *F. prausnitzii* (ratio 1  
6 monocyte:1 bacterium) before addition of individual DP8 $\alpha$  Treg clones (ratio 2 clones:1  
7 monocyte), in the presence or in the absence of the L243 antibody (10 $\mu$ g/ml) or its  
8 corresponding control Ig. Selected HLA-DR\*04-restricted clones were then extensively  
9 expanded for *in vivo* experiments.

10 *Isolation of murine bone-marrow derived dendritic cells.* For co-culture with DP8 $\alpha$  Treg clones,  
11 bone-marrow derived dendritic cells from a 10-week-old NSG-Ab<sup>o</sup>DR4 mice were  
12 differentiated *ex vivo*. Femurs and tibiae were collected from the mouse, soaked in 70% ethanol  
13 for 5 min and placed in Iscove's Modified Dulbecco's Medium (IMDM) medium supplemented  
14 with 10% FBS, 1% L-Glutamine (Gibco), 1% Penicillin/streptomycin (Gibco), 50  $\mu$ M of  
15 betamercaptoethanol (Sigma) (complete medium). Bone marrow was flushed from the bones  
16 using a 2 ml syringe and 26G needle, collected in a 50 ml tube and centrifugated 5 minutes at  
17 300g at 4. Supernatant was discarded and the cells were incubated at room temperature with  
18 red blood cell lysis solution (Miltenyi Biotec) for 5 minutes. After centrifugation 5 minutes at  
19 300 g at room temperature, the cells were washed and resuspended in complete medium  
20 supplemented with 10 ng/ml recombinant mouse granulocyte-macrophage colony-stimulating  
21 factor (GM-CSF; Miltenyi Biotec) at the concentration of 5 x 10<sup>6</sup> cells / ml in non-culture  
22 treated bacterial petri dish (Sarstedt) and placed at 37°C 5% CO<sub>2</sub> for 5 days. At day 5, culture  
23 medium was replaced. At day 7, BM-DC were detached using cold PBS, counted and frozen in  
24 FBS + 10% DMSO before being used for co-culture experiments.

25 *Human IL-10 and IFN $\gamma$  ELISAs.* DP8 $\alpha$  Treg clones were stimulated either specifically by APCs:  
26 autologous monocytes or murine NSG-Ab<sup>o</sup>DR4 BM-DC (ratio 2 lymphocytes:1 APC) loaded  
27 overnight or not with the A2-165 *F. prausnitzii* strain (multiplicity of infection, MOI 10), or  
28 non-specifically using coated anti-CD3 (clone OKT3, 1  $\mu$ g/ml, eBioscience, San Diego, CA)  
29 for 48h at 37°C. Supernatants were harvested at 24h for IFN $\gamma$  and 48h for IL-10. Cytokine  
30 production was measured using Ready-Set-Go ELISAs (eBioscience) according to the  
31 manufacturer's instructions.

32 SUPPLEMENTAL FIGURES

33

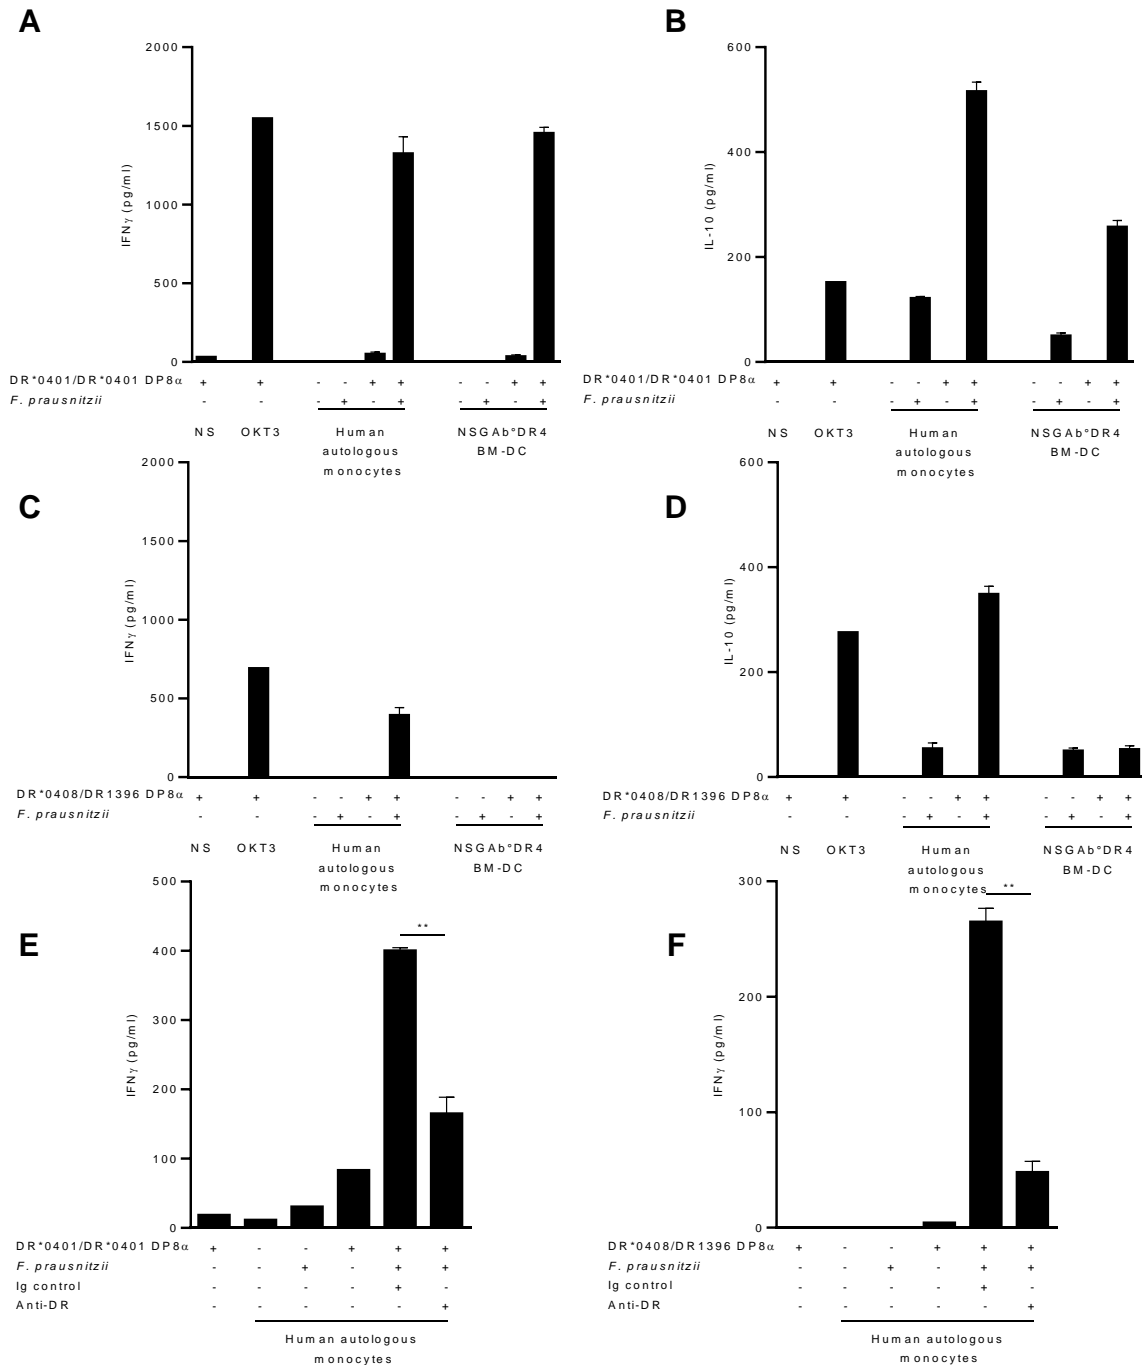

34

35 **Supplemental Figure 1. A human DP8 $\alpha$  Treg clone from a homozygous**  
 36 **DRb1\*0401/DRb1\*0401 donor responds to bone-marrow derived dendritic cells (BM-**  
 37 **DCs) from NSG-Ab $^{\circ}$ DR4 mice loaded with *F. prausnitzii*. (A, B) HLA-DR restriction of the**  
 38 **DRb1\*0401 / DRb1\*0401 and the DRb1\*0408 / DRb1\*1396 DP8 $\alpha$  clones using an anti-human**  
 39 **HLA-DR blocking antibody (L243 clone) or a control Ig. (C, D) IFN $\gamma$  and (E, F) IL-10**  
 40 **production upon co-culture of DP8 $\alpha$  Treg clones in non-stimulating conditions (NS), in**  
 41 **response to non-specific stimulation (anti-OKT3 antibody), human autologous monocytes or**

42 murine NSG-Ab<sup>o</sup>DR4 bone marrow derived dendritic cells (BM-DC) loaded or not with *F.*  
43 *prausnitzii*. Results are presented as the mean  $\pm$  S.E.M (n = 3). Two-tailed Mann-Whitney tests.  
44

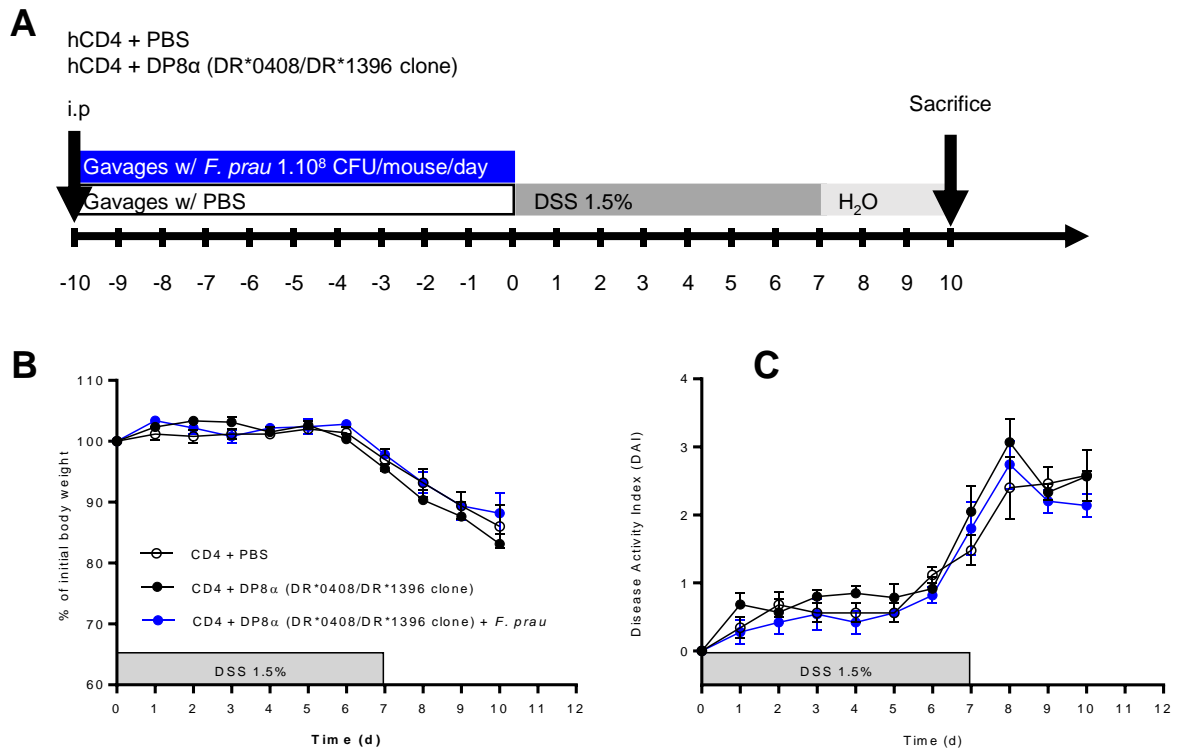

46

47 **Supplemental Figure 2. Human DP8 $\alpha$  Treg clone from a DRb1\*0408 / DRb1\*1396 donor**  
 48 **has no protective effect on DSS-induced colitis in NSG-Ab°DR4 mice. (A)** Experimental  
 49 outline: NSG-Ab°DR4 female mice were injected intraperitoneally (i.p.) with 2.10<sup>6</sup> human  
 50 peripheral CD4 effector T cells alone, or in combination with 2.10<sup>6</sup> human DR\*0408/DR\*1396  
 51 DP8 $\alpha$  clones and received daily intragastric gavage with 200  $\mu$ l PBS 1X or 1.10<sup>8</sup> CFU of *F.*  
 52 *prausnitzii* for 10 days before 1.5% DSS supplementation in drinking water for 7 days followed  
 53 by 3 days of regular drinking water. **(B)** Body weight and **(C)** disease activity index (DAI) were  
 54 assessed during the protocol in all groups of mice.

55

56 **SUPPLEMENTAL TABLES**

| <b>Variable</b>          | <b>HC</b>  | <b>CD</b>   | <b>UC</b>  |
|--------------------------|------------|-------------|------------|
| Group [n]                | 73         | 185         | 65         |
| Age [years]              | 39 (24.5)  | 39 (20)     | 36 (17.5)  |
| BMI [kg/m <sup>2</sup> ] | -          | 22.9 (4.8)  | 21.9 (5.4) |
| Gender [male]            | 41 (56.2%) | 115 (62.2%) | 37 (56.7%) |
| Intestinal resection     | -          | 72 (38.9%)  | 2 (3.1%)   |
| Smoking                  | -          | 40 (21.6%)  | 3 (4.6%)   |

57 **Supplemental Table 1. Clinical characteristics of healthy individuals and inflammatory**  
 58 **bowel disease (IBD) patients recruited in the study.** Continuous variables are presented as  
 59 median (interquartile range). Categorical variables are presented as counts (%). Abbreviation:  
 60 HC: healthy controls, CD: Crohn’s disease, UC: ulcerative colitis, BMI: Body mass index.

| Variable          | CD           | UC          |
|-------------------|--------------|-------------|
| Montreal (CD)     |              |             |
| L1                | 35 (18.9%)   | -           |
| L2                | 42 (22.7%)   | -           |
| L3                | 72 (38.9%)   | -           |
| L4                | 1 (0.5%)     | -           |
| L1 + L4           | 13 (7.0%)    | -           |
| L3 + L4           | 20 (10.8%)   | -           |
| Montreal (UC)     |              |             |
| E1                | -            | 2 (3.1%)    |
| E2                | -            | 25 (38.5%)  |
| E3                | -            | 38 (58.5%)  |
| Oral 5'-ASA       | 21 (11.35%)  | 28 (43.07%) |
| AZA/6-MP          | 41 (22.16%)  | 18 (27.69%) |
| Methotrexate      | 22 (11.89%)  | 1 (1.54%)   |
| Anti-TNF $\alpha$ | 158 (85.41%) | 53 (81.54%) |
| Vedolizumab       | 18 (9.73%)   | 12 (18.46%) |
| Ustekinumab       | 1 (0.54%)    | 0 (0%)      |

61 **Supplemental Table 2. Disease extent, disease severity and medications specific for IBD**  
62 **patients.** Disease extent and medications presented as counts (%). Disease activity presented  
63 as median (range). Abbreviation: AZA/6-MP: Azathioprine, 6-mercaptopurine; 5-ASA: 5-  
64 aminosalicylic acid

65
